# Supplementary material for: Thyroid endocrine status and biochemical stress responses in adult male Wistar rats chronically exposed to pristine polystyrene nanoplastics
Source: Royal Society of Chemistry journal article supplement (doi:10.1039/c9tx00147f), 2019-10-02
Supplement: c9tx00147f1.pdf [file c9tx00147f1.pdf]

## SUPPORTING INFORMATION

### **“Thyroid endocrine status and biochemical stress responses in adult male Wistar rats chronically exposed to pristine polystyrene nanoplastics”**

by: Fatemeh Amerreh, Akbar Eslami, Simin Fazelpour, Mohammad Ismail Zibaii, Mohammad  
Rafiee

#### **SI List:**

S1-- Table A: Turkey's multiple comparison of thyroid hormone levels, their ratios and TSH in Rats orally administered with PS NPs (6 animals in each group).

S2—Table B: Turkey's multiple comparison of biochemical parameters. Rats orally administered with PS NPs compared to the control group (6 animals in each group).

**S1: Table A**

Turkey's multiple comparison of thyroid hormone levels, their ratios and TSH in Rats orally administered with PS NPs (6 animals in

|                  | T3                     | T4                      | FT3                    | FT4                    | T3/T4                  | FT3/FT4                 | TSH                     |
|------------------|------------------------|-------------------------|------------------------|------------------------|------------------------|-------------------------|-------------------------|
| PS NPs           | (ng/ml)                | (ng/ml)                 | (pg/ml)                | (pg/ml)                | -                      | -                       | (m IU/ml)               |
| Dose (mg/kg/day) |                        |                         |                        |                        |                        |                         |                         |
| 0                | 1.37±0.06 <sup>a</sup> | 51.25±5.41 <sup>a</sup> | 2.66±0.04 <sup>a</sup> | 34±1.14 <sup>a</sup>   | 0.03±0.03 <sup>a</sup> | 0.61±0.09 <sup>ab</sup> | 3.93±0.14 <sup>ab</sup> |
| 1                | 1.29±0.06 <sup>a</sup> | 37.75±9.42 <sup>a</sup> | 2.14±0.03 <sup>b</sup> | 25.6±0.6 <sup>b</sup>  | 0.04±0.04 <sup>b</sup> | 0.84±0.1 <sup>abc</sup> | 3.55±0.54 <sup>a</sup>  |
| 3                | 1.22±0.04 <sup>a</sup> | 52.49±5.49 <sup>a</sup> | 1.67±0.08 <sup>c</sup> | 29.6±1.34 <sup>b</sup> | 0.03±0.03 <sup>a</sup> | 0.57±0.07 <sup>a</sup>  | 5.27±0.41 <sup>bc</sup> |
| 6                | 1.22±0.04 <sup>a</sup> | 50.15±5.3 <sup>a</sup>  | 2.33±0.11 <sup>b</sup> | 25.8±0.69 <sup>b</sup> | 0.03±0.03 <sup>a</sup> | 0.91±0.11 <sup>bc</sup> | 3.83±0.4 <sup>ab</sup>  |
| 10               | 1.15±0.06 <sup>a</sup> | 51.46±7.07 <sup>a</sup> | 0.92±0.07 <sup>d</sup> | 8.4±0.79 <sup>c</sup>  | 0.03±0.03 <sup>a</sup> | 1.13±0.13 <sup>c</sup>  | 5.64±0.36 <sup>c</sup>  |

each group). Results are expressed as means ± SEM \*

\* Different letters for the significances demonstrate that there are significant differences among groups ( $p < 0.05$ ).

**S2: Table B**

Turkey's multiple comparison of biochemical parameters. Rats orally administered with PS NPs compared to the control group (6

|                  | LDL                     | HDL                     | Cholesterol              | Creatinine             | GOT                      | GPT                      |
|------------------|-------------------------|-------------------------|--------------------------|------------------------|--------------------------|--------------------------|
| PS NPs           | (mg/dl)                 | (mg/dl)                 | (mg/dl)                  | (m IU/ml)              | (U/L)                    | (U/L)                    |
| Dose (mg/kg/day) |                         |                         |                          |                        |                          |                          |
| 0                | 21.68±0.66 <sup>a</sup> | 56.75±1.8 <sup>a</sup>  | 40.38±4.54 <sup>a</sup>  | 0.68±0.01 <sup>a</sup> | 171.25±2.36 <sup>a</sup> | 43.88±1.23 <sup>ab</sup> |
| 1                | 22.20±1 <sup>a</sup>    | 48.25±7.16 <sup>a</sup> | 56.50±0.55 <sup>b</sup>  | 0.73±0.02 <sup>a</sup> | 172.5±3.57 <sup>a</sup>  | 41.0±0.91 <sup>a</sup>   |
| 3                | 44.83±4.4 <sup>b</sup>  | 20.25±1.11 <sup>c</sup> | 60.00±2.18 <sup>b</sup>  | 0.73±0.02 <sup>a</sup> | 173.75±1.38 <sup>a</sup> | 47.25±0.43 <sup>bc</sup> |
| 6                | 56.73±1.7± <sup>c</sup> | 18.50±0.65 <sup>c</sup> | 65.88±1.08 <sup>bc</sup> | 0.88±0.05 <sup>b</sup> | 189.75±6.12 <sup>b</sup> | 48.88±0.94 <sup>c</sup>  |
| 10               | 58.00±1.67 <sup>c</sup> | 18.00±1.29 <sup>c</sup> | 75.13±3.54 <sup>c</sup>  | 1.00±0.05 <sup>b</sup> | 193.25±3.07 <sup>b</sup> | 52.88±0.83 <sup>d</sup>  |

animals in each group). Results are expressed as means ± SEM \*

\*Different letters for the significances demonstrate that there are significant differences among groups ( $p < 0.05$ ).
